# Supplementary material for: Studying the degradation of bulk PTFE into microparticlesviaSP ICP-MS: a systematically developed method for the detection of F-containing particles
Source: Royal Society of Chemistry journal article supplement (doi:10.1039/d4ja00101j), 2024-01-01

## Supplementary material

### **Studying the degradation of bulk PTFE into microparticles via SP ICP-MS: A systematically developed method for the detection of F-containing particles**

Raquel Gonzalez de Vega<sup>1\*</sup>, Thebny Thaíse Moro<sup>1,2</sup>, Bernhard Grüner<sup>1,3</sup>, Tatiane de Andrade Maranhão<sup>2</sup>, Maximilian Huber<sup>4</sup>, Natalia Ivleva<sup>4</sup>, Etienne Skrzypek<sup>5</sup>, Jörg Feldmann<sup>1</sup>, David Clases<sup>6\*</sup>

<sup>1</sup>TESLA- Analytical Chemistry, Institute of Chemistry, University of Graz, Graz, Austria

<sup>2</sup>Departamento de Química, Campus Trindade, Universidade Federal de Santa Catarina, Florianópolis, Brazil

<sup>3</sup>Institute of Inorganic and Analytical Chemistry, University of Münster, Münster, Germany

<sup>4</sup>Institute of Water Chemistry, Chair of Analytical Chemistry and Water Chemistry, Technical University of Munich, Munich, Germany

<sup>5</sup>Department of Petrology and Geochemistry, NAWI Graz Geocenter, University of Graz, Graz, Austria

<sup>6</sup>NanoMicroLab, Institute of Chemistry, University of Graz, Graz, Austria

\*Corresponding author: [Raquel.gonzalez-de-vega@uni-graz.at](mailto:Raquel.gonzalez-de-vega@uni-graz.at), [David.Clases@uni-graz.at](mailto:David.Clases@uni-graz.at)

#### **Table of content:**

**Table S1:** Doehlert experimental design for optimization of the (A) plasma, and (B) bandpass

**Table S2:** Central Composite experimental design for optimization of extract 2 and deflect of ion optics.

**Figure S1:** Colorimetric map obtained from the Central Composite experimental design (2 factors: 10 exp) for ion optics optimisation. Selected conditions are marked as a white circle.

**Table S3:** Factorial design 2<sup>5</sup> executed to discriminate between significant and non-significant factors that can affect the CRC performance

**Figure S2:** Pareto chart for the factorial design 2<sup>5</sup> showing the significant factors that affect the CRC performance

**Table S4:** Box-Behnken experimental design for optimization of H<sub>2</sub> flow, O<sub>2</sub> flow, and energy discrimination of CRC.

**Figure S3:** Box-Behnken Designs (3 factors: 15 exp) for CRC optimisations: A) O<sub>2</sub> flow vs H<sub>2</sub> flow, B) Energy discrimination vs H<sub>2</sub> flow and C) Energy discrimination vs O<sub>2</sub> flow. Optimised values are shown at the bottom of the figures, respectively.

**Table S1:** Doehlert experimental design for optimisation of the (A) plasma, and (B) bandpass

| Exp. | Matrix Code |            | Experimental Conditions |                                        |                  |                    |
|------|-------------|------------|-------------------------|----------------------------------------|------------------|--------------------|
|      |             |            | (A) Plasma              |                                        | (B) Bandpass     |                    |
|      | Variable 1  | Variable 2 | Sample Depth (mm)       | Nebulizer Flow (mL min <sup>-1</sup> ) | Q1 Mass Gain (V) | Q1 Mass Offset (V) |
| 1    | 0           | 0          | 4.5                     | 1.40                                   | 10               | 130                |
| 2    | 0           | 1          | 4.5                     | 1.50                                   | 10               | 150                |
| 3    | 0.866       | 0.5        | 6.0                     | 1.45                                   | 20               | 140                |
| 4    | 0           | -1         | 4.5                     | 1.30                                   | 10               | 110                |
| 5    | -0.866      | -0.5       | 3.0                     | 1.35                                   | 0                | 120                |
| 6    | -0.866      | 0.5        | 3.0                     | 1.45                                   | 0                | 140                |
| 7    | 0.866       | -0.5       | 6.0                     | 1.35                                   | 20               | 120                |
| CP   | 0           | 0          | 4.5                     | 1.40                                   | 10               | 130                |
| CP   | 0           | 0          | 4.5                     | 1.40                                   | 10               | 130                |
| CP   | 0           | 0          | 4.5                     | 1.40                                   | 10               | 130                |

**Table S2:** Central Composite experimental design for optimization of extract 2 and deflect of ion optics.

| Exp.    | Matrix Code |            | Experimental Conditions |             |
|---------|-------------|------------|-------------------------|-------------|
|         | Variable 1  | Variable 2 | Extract 2 (V)           | Deflect (V) |
| 1       | -1          | -1         | -5                      | -5          |
| 2       | -1          | 1          | -5                      | 5           |
| 3       | 1           | -1         | 5                       | -5          |
| 4       | 1           | 1          | 5                       | 5           |
| 5       | -1.41421    | 0          | -7                      | 0           |
| 6       | 1.41421     | 0          | 7                       | 0           |
| 7       | 0           | -1.41421   | 0                       | -7          |
| 8       | 0           | 1.41421    | 0                       | 7           |
| 9 (CP)  | 0           | 0          | 0                       | 0           |
| 10 (CP) | 0           | 0          | 0                       | 0           |

**Figure S1:** Colorimetric map obtained from the Central Composite experimental design (2 factors: 10 exp) for ion optics optimisation. Selected conditions are marked as a white circle.

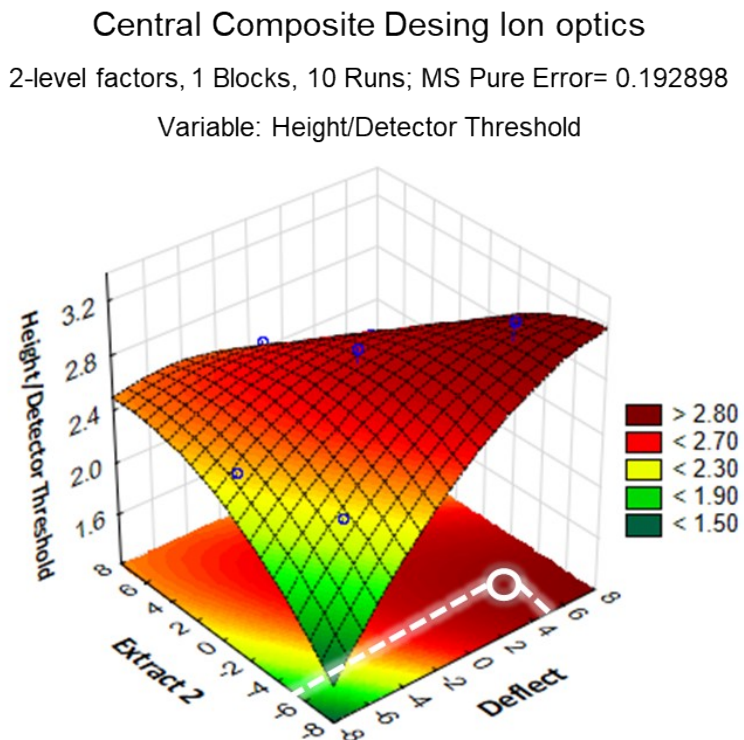

**Table S3:** Factorial design 2<sup>5</sup> executed to discriminate between significant and non-significant factors that can affect the CRC performance

| Exp. | Matrix Code |       |       |       |       | Experimental Conditions |                       |         |                     |                     |
|------|-------------|-------|-------|-------|-------|-------------------------|-----------------------|---------|---------------------|---------------------|
|      | Var 1       | Var 2 | Var 3 | Var 4 | Var 5 | Oct Bias                | Energy Discrimination | He Flow | H <sub>2</sub> Flow | O <sub>2</sub> Flow |
| 1    | -1          | -1    | -1    | -1    | -1    | -8                      | -5                    | 0       | 0                   | 5                   |
| 2    | 1           | -1    | -1    | -1    | -1    | -2                      | -5                    | 0       | 0                   | 5                   |
| 3    | -1          | 1     | -1    | -1    | -1    | -8                      | 2                     | 0       | 0                   | 5                   |
| 4    | 1           | 1     | -1    | -1    | -1    | -2                      | 2                     | 0       | 0                   | 5                   |
| 5    | -1          | -1    | 1     | -1    | -1    | -8                      | -5                    | 2       | 0                   | 5                   |
| 6    | 1           | -1    | 1     | -1    | -1    | -2                      | -5                    | 2       | 0                   | 5                   |
| 7    | -1          | 1     | 1     | -1    | -1    | -8                      | 2                     | 2       | 0                   | 5                   |
| 8    | 1           | 1     | 1     | -1    | -1    | -2                      | 2                     | 2       | 0                   | 5                   |
| 9    | -1          | -1    | -1    | 1     | -1    | -8                      | -5                    | 0       | 2                   | 5                   |
| 10   | 1           | -1    | -1    | 1     | -1    | -2                      | -5                    | 0       | 2                   | 5                   |
| 11   | -1          | 1     | -1    | 1     | -1    | -8                      | 2                     | 0       | 2                   | 5                   |
| 12   | 1           | 1     | -1    | 1     | 24    | -2                      | 2                     | 0       | 2                   | 5                   |
| 13   | -1          | -1    | 1     | 1     | -1    | -8                      | -5                    | 2       | 2                   | 5                   |
| 14   | 1           | -1    | 1     | 1     | -1    | -2                      | -5                    | 2       | 2                   | 5                   |
| 15   | -1          | 1     | 1     | 1     | -1    | -8                      | 2                     | 2       | 2                   | 5                   |
| 16   | 1           | 1     | 1     | 1     | -1    | -2                      | 2                     | 2       | 2                   | 5                   |
| 17   | -1          | -1    | -1    | -1    | 1     | -8                      | -5                    | 0       | 0                   | 30                  |
| 18   | 1           | -1    | -1    | -1    | 1     | -2                      | -5                    | 0       | 0                   | 30                  |
| 19   | -1          | 1     | -1    | -1    | 1     | -8                      | 2                     | 0       | 0                   | 30                  |
| 20   | 1           | 1     | -1    | -1    | 1     | -2                      | 2                     | 0       | 0                   | 30                  |
| 21   | -1          | -1    | 1     | -1    | 1     | -8                      | -5                    | 2       | 0                   | 30                  |
| 22   | 1           | -1    | 1     | -1    | 1     | -2                      | -5                    | 2       | 0                   | 30                  |
| 23   | -1          | 1     | 1     | -1    | 1     | -8                      | 2                     | 2       | 0                   | 30                  |
| 24   | 1           | 1     | 1     | -1    | 1     | -2                      | 2                     | 2       | 0                   | 30                  |
| 25   | -1          | -1    | -1    | 1     | 1     | -8                      | -5                    | 0       | 2                   | 30                  |
| 26   | 1           | -1    | -1    | 1     | 1     | -2                      | -5                    | 0       | 2                   | 30                  |
| 27   | -1          | 1     | -1    | 1     | 1     | -8                      | 2                     | 0       | 2                   | 30                  |
| 28   | 1           | 1     | -1    | 1     | 1     | -2                      | 2                     | 0       | 2                   | 30                  |
| 29   | -1          | -1    | 1     | 1     | 1     | -8                      | -5                    | 2       | 2                   | 30                  |
| 30   | 1           | -1    | 1     | 1     | 1     | -2                      | -5                    | 2       | 2                   | 30                  |
| 31   | -1          | 1     | 1     | 1     | 1     | -8                      | 2                     | 2       | 2                   | 30                  |
| 32   | 1           | 1     | 1     | 1     | 1     | -2                      | 2                     | 2       | 2                   | 30                  |

**Figure S2:** Pareto chart for the factorial design  $2^5$  showing the significant factors that affect the CRC performance.

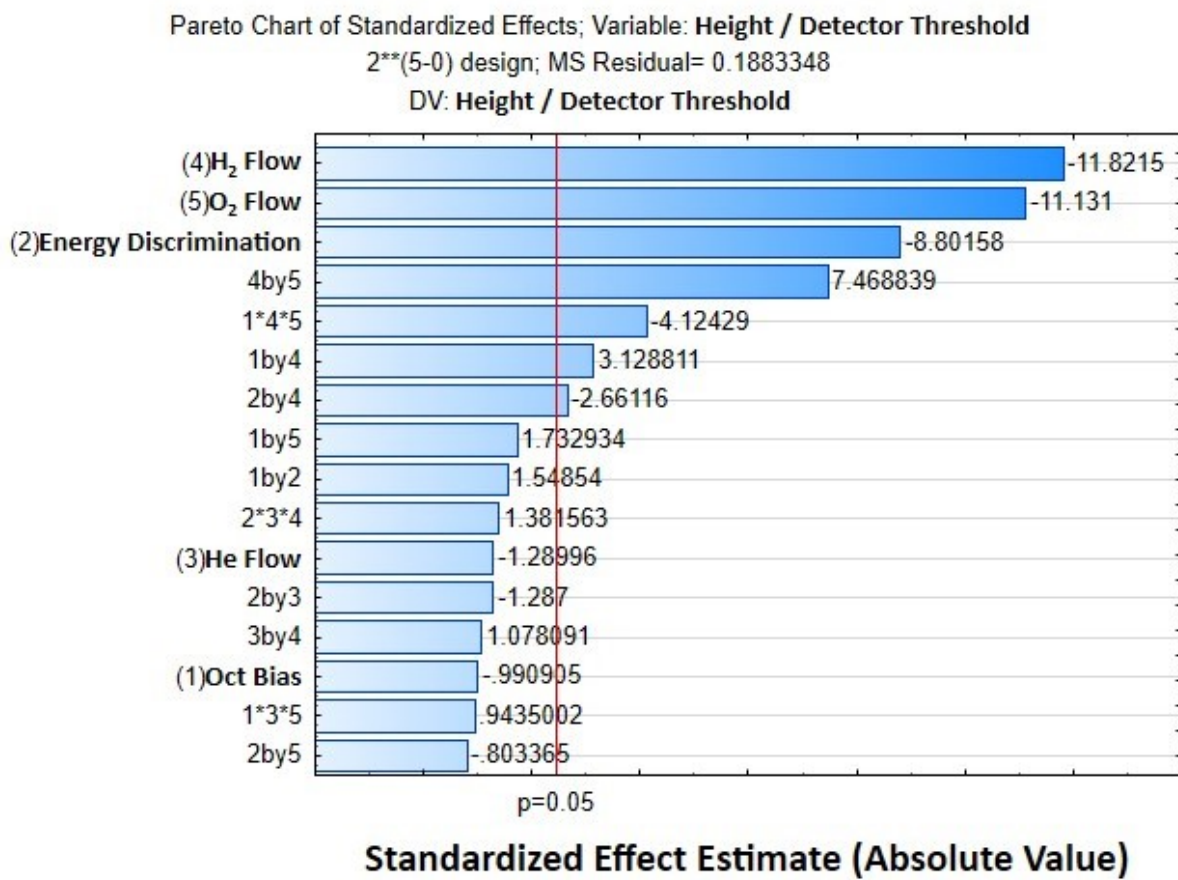

**Table S4:** Box-Behnken experimental design for optimization of H<sub>2</sub> flow, O<sub>2</sub> flow, and energy discrimination of CRC.

| Exp. | Matrix Code |       |       | Experimental Conditions |                     |                       |
|------|-------------|-------|-------|-------------------------|---------------------|-----------------------|
|      | Var 1       | Var 2 | Var 3 | H <sub>2</sub> Flow     | O <sub>2</sub> Flow | Energy Discrimination |
| 1    | -1          | -1    | 0     | 0                       | 5                   | -10                   |
| 2    | 1           | -1    | 0     | 1                       | 5                   | -10                   |
| 3    | -1          | 1     | 0     | 0                       | 15                  | -10                   |
| 4    | 1           | 1     | 0     | 1                       | 15                  | -10                   |
| 5    | -1          | 0     | -1    | 0                       | 10                  | -15                   |
| 6    | 1           | 0     | -1    | 1                       | 10                  | -15                   |
| 7    | -1          | 0     | 1     | 0                       | 10                  | -5                    |
| 8    | 1           | 0     | 1     | 1                       | 10                  | -5                    |
| 9    | 0           | -1    | -1    | 0.5                     | 5                   | -15                   |
| 10   | 0           | 1     | -1    | 0.5                     | 15                  | -15                   |
| 11   | 0           | -1    | 1     | 0.5                     | 5                   | -5                    |
| 12   | 0           | 1     | 1     | 0.5                     | 15                  | -5                    |
| 13   | 0           | 0     | 0     | 0.5                     | 10                  | -10                   |
| 14   | 0           | 0     | 0     | 0.5                     | 10                  | -10                   |
| 15   | 0           | 0     | 0     | 0.5                     | 10                  | -10                   |

**Figure S3.** Box-Behnken Designs (3 factors: 15 exp) for CRC optimisations: A) O<sub>2</sub> flow vs H<sub>2</sub> flow, B) Energy discrimination vs H<sub>2</sub> flow and C) Energy discrimination vs O<sub>2</sub> flow. Optimised values are shown at the bottom of the figures, respectively.

### Box-Behnken Desings for CRC

3-level factors, 1 Blocks, 15 Runs; MS Pure Error= 0.0680755

Variable: Height/Detector Threshold

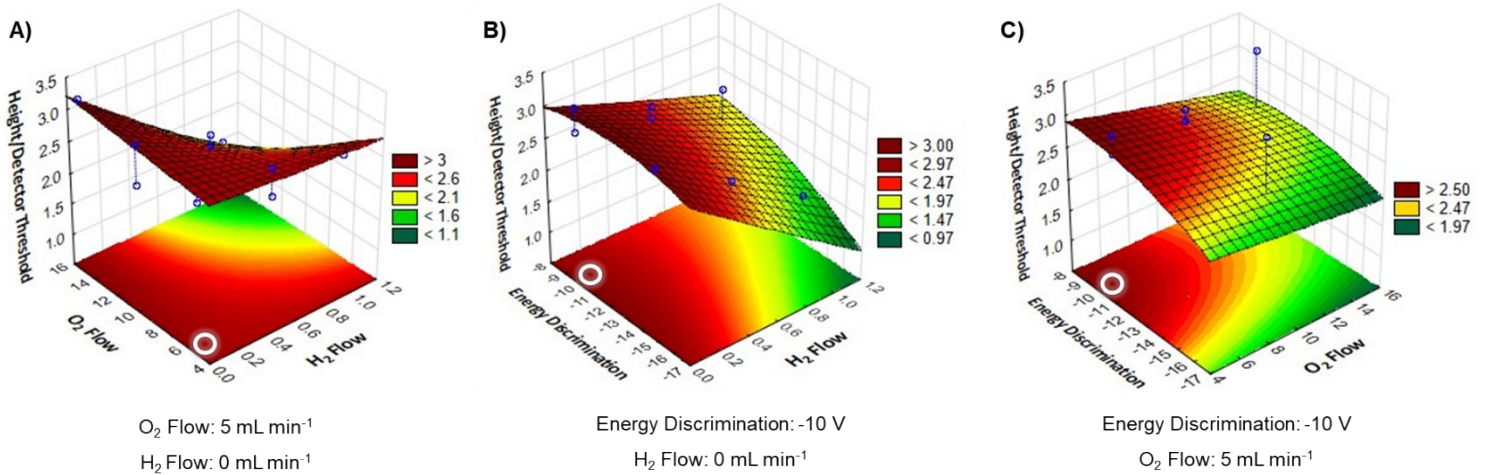

Supplement: d4ja00101j1.pdf [file d4ja00101j1.pdf]
